# Supplementary material for: Gene co-expression network analysis reveals key potential gene modules in utero-vaginal junction associated with duration of fertility trait of breeder hens
Source: PubMed Central journal article supplement (PMC6761187; doi:10.1038/s41598-019-50148-6), 2019-09-25
Supplement: 41598_2019_50148_MOESM1_ESM.pdf [file 41598_2019_50148_MOESM1_ESM.pdf]

**Gene co-expression network analysis reveals key potential gene modules in utero-vaginal junction associated with duration of fertility trait of breeder hens**

Lantao Gu <sup>1,2</sup>, Ruoxi Jing <sup>1</sup>, Yanzhang Gong <sup>1</sup>, Mei Yu <sup>1</sup>, Abdelmotaleb Elokil <sup>1,3</sup>, Shijun Li <sup>1\*</sup>

1 Key Laboratory of Agricultural Animal Genetics, Breeding and Reproduction of Ministry of Education, College of Animal Science and Technology, Huazhong Agricultural University, Wuhan, Hubei, China.

2 Guilin Medical University, Guilin, Guangxi, China.

3 Department of Animal Production, Faculty of Agriculture, Benha University, Moshtohor, Egypt.

\*Corresponding author: Shijun Li, [lishijun@mail.hzau.edu.cn](mailto:lishijun@mail.hzau.edu.cn)

**Table S1. the duration of fertility traits of hens used for RNA sequence.**

| <b>Sample ID</b> | <b>DN</b>  | <b>FN</b>  |
|------------------|------------|------------|
| <b>1</b>         | 11.00±1.00 | 9.00±1.00  |
| <b>2</b>         | 12.00±1.00 | 8.33±1.53  |
| <b>3</b>         | 12.67±1.53 | 11.00±1.00 |
| <b>4</b>         | 14.00±1.00 | 9.33±1.15  |
| <b>5</b>         | 16.00±0.00 | 10.33±1.15 |
| <b>6</b>         | 14.67±1.53 | 9.67±0.58  |
| <b>7</b>         | 12.33±1.53 | 10.00±1.73 |
| <b>8</b>         | 10.33±1.15 | 6.00±1.73  |
| <b>9</b>         | 9.00±1.00  | 5.67±1.15  |
| <b>10</b>        | 6.33±1.53  | 3.67±1.15  |
| <b>11</b>        | 16.00±1.00 | 14.33±1.15 |
| <b>12</b>        | 16.00±1.00 | 12.33±0.58 |
| <b>13</b>        | 16.00±2.00 | 13.67±0.58 |
| <b>14</b>        | 15.67±1.53 | 13.67±0.58 |
| <b>15</b>        | 17.33±1.53 | 15.00±1.00 |
| <b>16</b>        | 17.33±1.15 | 14.33±2.31 |
| <b>17</b>        | 19.33±0.58 | 12.67±0.58 |
| <b>18</b>        | 18.00±1.00 | 14.67±0.58 |
| <b>19</b>        | 15.67±1.53 | 11.33±0.58 |
| <b>20</b>        | 16.00±0.00 | 7.67±1.53  |
| <b>21</b>        | 17.33±1.53 | 11.67±2.08 |

DN = the number of days post-insemination until the last fertile egg was produced; and FN = the number of fertile eggs were produced after a single AI. Values are present as Mean±SD of three measurement.

**Table S2. Ten levels of duration of fertility traits and the relevant samples in each level.**

| <b>DN</b>          | <b>Samples ID</b>        | <b>FN</b>          | <b>Samples ID</b>         |
|--------------------|--------------------------|--------------------|---------------------------|
| <b>&lt;8</b>       | <b>10</b>                | <b>&lt; 4.5</b>    | <b>10</b>                 |
| <b>8 - 9.3</b>     | <b>9</b>                 | <b>4.5 - 5.8</b>   | <b>9</b>                  |
| <b>9.3 - 10.6</b>  | <b>8</b>                 | <b>5.8 - 7.1</b>   | <b>8</b>                  |
| <b>10.6 - 11.9</b> | <b>1</b>                 | <b>7.1 - 8.4</b>   | <b>2</b>                  |
| <b>11.9 - 13.2</b> | <b>2; 7; 3;</b>          | <b>8.4 - 9.7</b>   | <b>1; 4; 6</b>            |
| <b>13.2 - 14.5</b> | <b>4</b>                 | <b>9.7 - 11</b>    | <b>7; 5; 3</b>            |
| <b>14.5 - 15.8</b> | <b>6; 19; 14</b>         | <b>11 - 12.3</b>   | <b>19; 21</b>             |
| <b>15.8 - 17.1</b> | <b>20; 5; 12; 13; 11</b> | <b>12.3 - 13.6</b> | <b>12; 17</b>             |
| <b>17.1 - 18.4</b> | <b>21; 16; 15; 18</b>    | <b>13.6 - 14.9</b> | <b>14; 13; 11; 16; 18</b> |
| <b>&gt; 18.4</b>   | <b>17</b>                | <b>&gt; 14.9</b>   | <b>15</b>                 |

DN = the number of days post-insemination until the last fertile egg was produced; and FN = the number of fertile eggs were produced after a single AI. The hens' duration of fertility traits DN and FN are normally distributed, and 95% hens were ranged from 8.35-18.00 and 4.67-15.00 respectively. Therefore, the hens were divided into 10 levels according to the DN, including <8, 8-9.3, 9.3-10.6, 10.6-11.9, 11.9-13.2, 13.2-14.5, 14.5-15.8, 15.8-17.1, 17.1-18.4, >18.4. And according to the FN, they were also divided into 10 levels: <4.5, 4.5-5.8, 5.8-7.1, 7.1-8.4, 8.4-9.7, 9.7-11, 11-12.3, 12.3-13.6, 13.6-14.9, >14.9. Twenty-one hens were selected to making sure that there are at least one sample in each level were used for RNA sequencing.

**Table S3. the RNA sequence result after quality control.**

| <b>Sample ID</b> | <b>Raw reads</b> | <b>Clean reads</b> | <b>Clean ratio</b> | <b>Mapped reads</b> | <b>Mapping ratio</b> |
|------------------|------------------|--------------------|--------------------|---------------------|----------------------|
| <b>1</b>         | 41 130 278       | 34 884 196         | 84.81%             | 25 705 055          | 73.69%               |
| <b>2</b>         | 43 892 552       | 39 684 001         | 90.41%             | 28 888 083          | 72.80%               |
| <b>3</b>         | 43 961 908       | 35 884 698         | 81.63%             | 26 732 395          | 74.50%               |
| <b>4</b>         | 41 283 652       | 33 647 366         | 81.50%             | 24 279 224          | 72.16%               |
| <b>5</b>         | 40 136 168       | 33 113 619         | 82.50%             | 23 923 796          | 72.25%               |
| <b>6</b>         | 40 088 882       | 31 612 063         | 78.85%             | 23 227 838          | 73.48%               |
| <b>7</b>         | 43 539 586       | 40 121 186         | 92.15%             | 29 153 043          | 72.66%               |
| <b>8</b>         | 46 562 544       | 42 057 498         | 90.32%             | 30 903 366          | 73.48%               |
| <b>9</b>         | 43 885 076       | 39 269 096         | 89.48%             | 28 946 760          | 73.71%               |
| <b>10</b>        | 46 951 108       | 41 988 103         | 89.43%             | 31 467 231          | 74.94%               |
| <b>11</b>        | 41 835 408       | 34 653 595         | 82.83%             | 25 247 392          | 72.86%               |
| <b>12</b>        | 45 608 594       | 41 205 537         | 90.35%             | 30 132 184          | 73.13%               |
| <b>13</b>        | 49 674 102       | 43 713 435         | 88.00%             | 31 818 985          | 72.79%               |
| <b>14</b>        | 44 831 188       | 37 346 451         | 83.30%             | 27 328 050          | 73.17%               |
| <b>15</b>        | 43 294 774       | 35 624 162         | 82.28%             | 25 746 064          | 72.27%               |
| <b>16</b>        | 42 552 386       | 33 843 528         | 79.53%             | 24 736 750          | 73.09%               |
| <b>17</b>        | 46 773 856       | 38 270 144         | 81.82%             | 28 077 143          | 73.37%               |
| <b>18</b>        | 44 089 100       | 35 279 337         | 80.02%             | 26 004 719          | 73.71%               |
| <b>19</b>        | 41 473 644       | 36 657 696         | 88.39%             | 27 066 117          | 73.83%               |
| <b>20</b>        | 46 392 040       | 42 170 024         | 90.90%             | 30 958 973          | 73.41%               |
| <b>21</b>        | 43 113 222       | 39 916 485         | 92.59%             | 29 530 245          | 73.98%               |

Clean ratio = Clean reads/Raw reads; Mapping ratio=Mapped reads/All reads. Reference genomes:

Gallus\_gallus.Gallus\_gallus-5.0.

**Table S4. Primer pairs used for RT-PCR.**

| <b>Primer pairs</b> | <b>Sequence (5'-3')</b> |
|---------------------|-------------------------|
| F- KBTBD2           | CGCCAGCCTAACATGAACAC    |
| R- KBTBD2           | TCAACTTCACGCAGAAAGCA    |
| F- DCAF6            | GGAAGAGTTGGAGACTTTGA    |
| R- DCAF6            | AAATGGATGAGGCTGAAGAC    |
| F- LRP3             | CAAGCTGCCTACTTATATTC    |
| R- LRP3             | GCTCATTGGGTTACATAGTC    |
| F- MBNL1            | GTAAGAATGTCAGTCATCGT    |
| R- MBNL1            | CCATAGCAACAACCTTAACTC   |
| F- MFAP3L           | AGGACGCTTGAACCTAACAC    |
| R- MFAP3L           | ATGGCCTTCTCAATCACAAC    |
| F- ZCRB1            | CTTCTTGCAGGTAGTATCTT    |
| R- ZCRB1            | TACAACCCCATGCAGAGAAG    |
| F- KLHL13           | ATAGGTGGATAAGGGCTAGA    |
| R- KLHL13           | CAGAGGACACGTTATGCAAG    |
| F- CLK2             | TCTGCATGTCCATACTGTAA    |
| R- CLK2             | CACGGAAACAGAGAAGCTAC    |
| F-ANAPC13           | AAGTCATAGGGAAGCACCAG    |
| R-ANAPC13           | CGATGGTGTGAAGGAATCAG    |
| F1- SPG11           | G TTCAGTCATTAGTGCCGTT   |
| R1- SPG11           | AGTCCAGTCGTTCCATTACA    |
| F1-SCML2            | CGATAGAGGAAGTAATGTGT    |
| R1-SCML2            | CAGCTTCAGTCCCATGTATT    |
| F1- RALGAPA1        | TGCAAGGGATGGAATTACAC    |
| R1- RALGAPA1        | AGCAGGGATGTTGAGTGAGA    |
| F1- PSMA7           | GAAGCCATTGAAACAGATGA    |
| R1- PSMA7           | ATCTCTTCTCATAACAGCCA    |
| F1-CTDSPL2          | TATAGAAAGCTGGTTCATGG    |
| R1-CTDSPL2          | CGAAATCTGTCTCTGATGTG    |
| F1- SGSM2           | CCAACATGCGGTCTCTAATC    |
| R1- SGSM2           | ATCCTCGTACAACAATTCTC    |

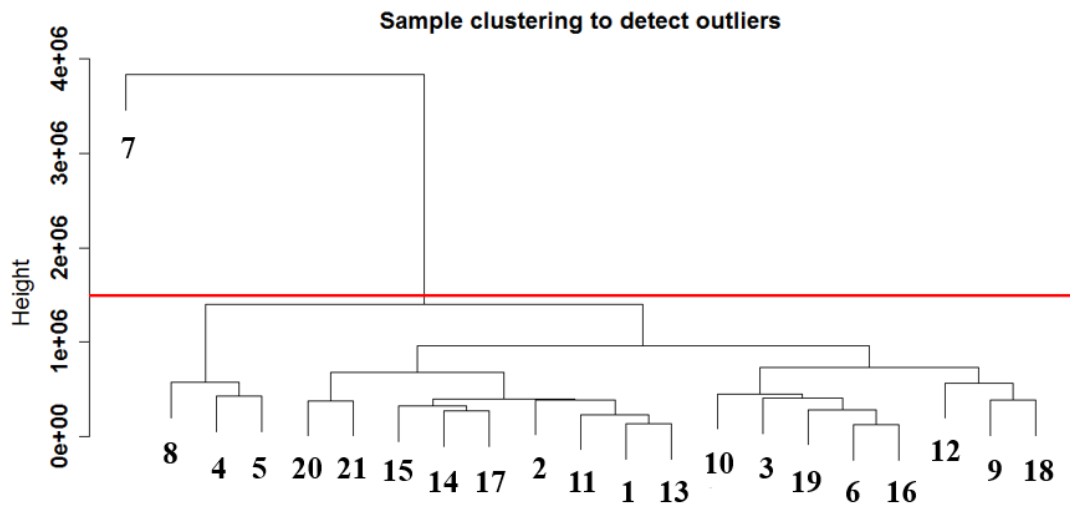

Figure S1 Clustering dendrogram of samples based on their Euclidean distance. The red line means the threshold indicating the outliers.

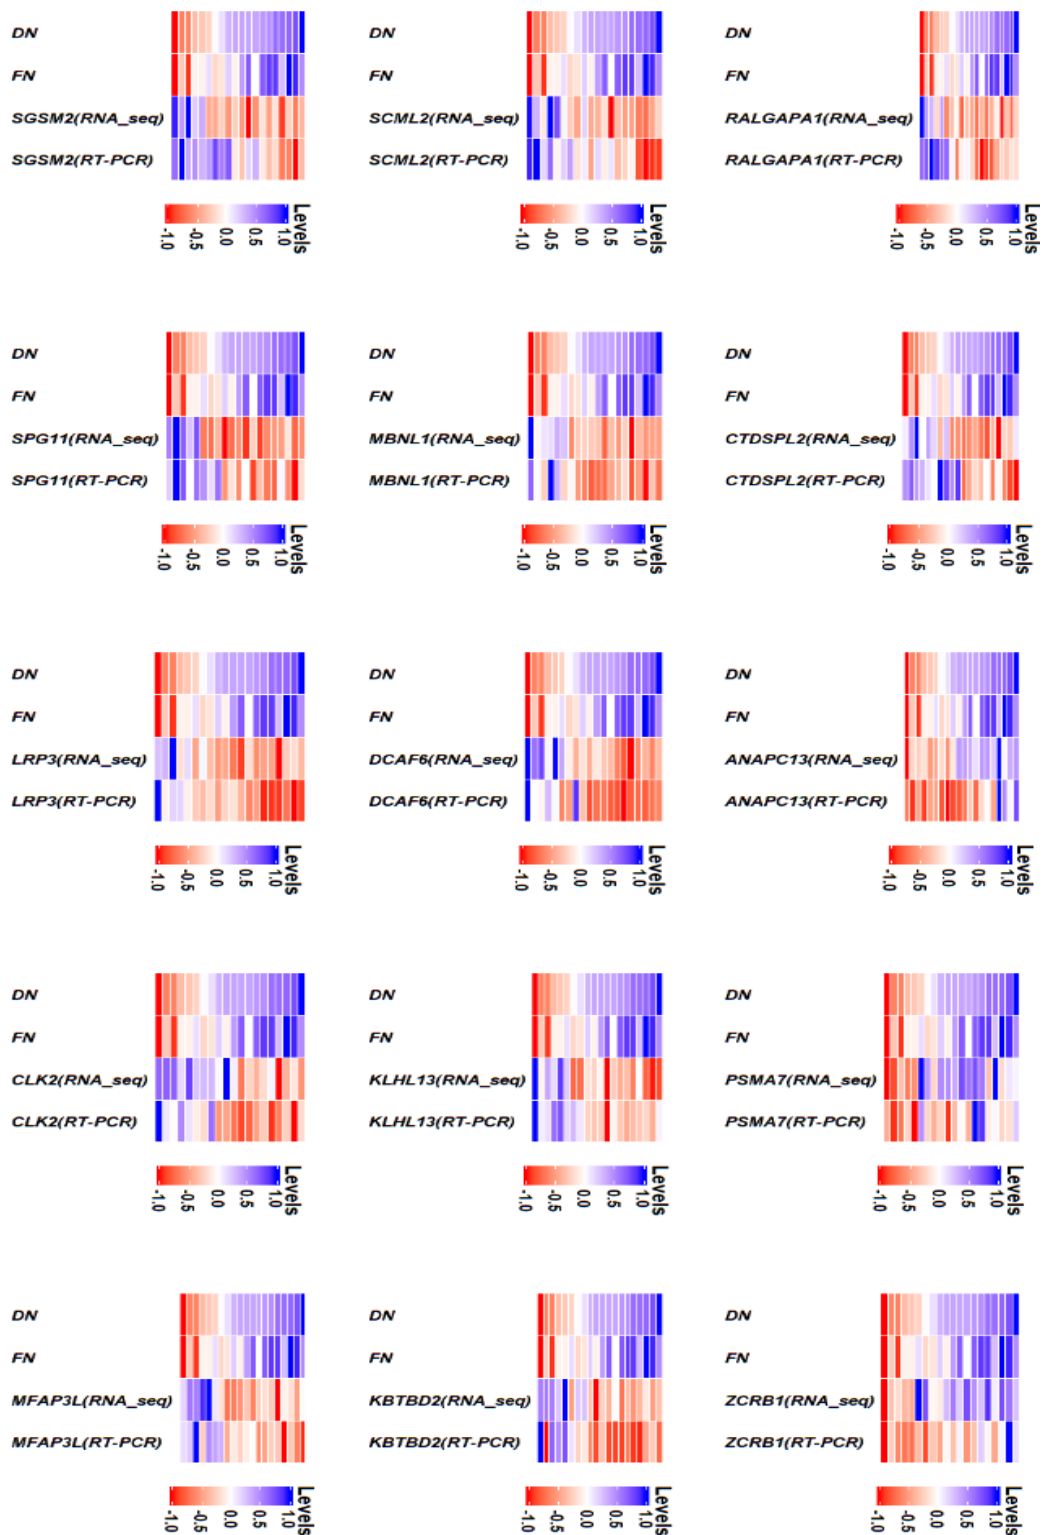

Figure S2 the heat maps of hub genes expression levels (including RNA seq and qPCR) and duration of fertility traits (including DN and FN). The expression levels of RNA-seq and qPCR of 20 samples, including their duration of fertility traits, were rescaled from -1 to 1 and plotted. DN = the number of days post-insemination until the last fertile egg was produced; and FN = the number of fertile eggs were produced after a single AI.
